# Supplementary material
Source: PubMed Central journal article supplement (PMC5464010)
Supplement: es7b01039_si_001.pdf [file es7b01039_si_001.pdf]

Supporting Information: STABLE MERCURY ISOTOPES IN POLISHED RICE (*Oryza sativa*  
L.) AND HUMAN HAIR FROM RICE CONSUMERS

Sarah E. Rothenberg, Runsheng Yin, James P. Hurley, David P. Krabbenhoft, Yuyun Ismawati,  
Chuan Hong, Alexis Donohue

Table of Contents (6 pages)

Table S1      page S1

Table S1      page S2

Table S3      page S3-S4

Figure S1     page S5

References    page S6

Table S1. Fish tissue total mercury (THg) concentrations.<sup>1</sup>

|                        | <b>Sample size</b> | <b>THg Average <math>\pm</math> 1 SD (ng/g)</b> |
|------------------------|--------------------|-------------------------------------------------|
| <b>Freshwater fish</b> | 13                 | 31 $\pm$ 31                                     |
| <b>Marine fish</b>     | 1164               | 56 $\pm$ 30                                     |
| <b>Eel</b>             | 21                 | 50 $\pm$ 10                                     |
| <b>Shrimp</b>          | 10                 | 10                                              |
| <b>Crab</b>            | 10                 | 74                                              |
| <b>Snails</b>          | 10                 | 31                                              |
| <b>Other shellfish</b> | 735                | 68 $\pm$ 110                                    |

Table S2. Quality assurance/quality control for rice, hair, and fish mercury measurements.

|                                                  | <b>Daxin hair</b> | <b>Daxin rice<sup>1</sup></b> | <b>Daxin fish<sup>1</sup></b> | <b>Wanshan rice<sup>1</sup></b> | <b>Arkansas rice<sup>1</sup></b> | <b>Indonesian rice</b> |
|--------------------------------------------------|-------------------|-------------------------------|-------------------------------|---------------------------------|----------------------------------|------------------------|
| <b>THg RPD (%) (n)</b>                           | 7.1 (13)          | 0.59 (2)                      | 4.2 (13)                      | 6.2 (17)                        | 9.3 (29)                         | 12 (13)                |
| <b>THg IAEA 086 Human Hair: % Recovery (n)</b>   | 95 (2)            | NA                            | NA                            | NA                              | 87 (2)                           | NA                     |
| <b>THg NRC-TORT2 Lobster % Recovery (n)</b>      | NA                | 104 (2)                       | NA                            | 110 (4)                         | 102 (2)                          | NA                     |
| <b>THg NIST 1515 Apple Leaves % Recovery (n)</b> | NA                | 91 (2)                        | 91 (4)                        | NA                              | 89 (4)                           | 100 (4)                |
| <b>THg NIST 1568a % Recovery (n)</b>             | NA                | 88 (4)                        | NA                            | 74 (5)                          | NA                               | NA                     |
|                                                  |                   |                               |                               |                                 |                                  |                        |
| <b>MeHg RPD (%)</b>                              | NA                | 7.7 (56)                      | NA                            | 1.5 (3)                         | 18 (6)                           | 14 (9)                 |
| <b>MeHg Matrix spikes % Recovery (n)</b>         | NA                | 96 (56)                       | NA                            | 85 (3)                          | NA                               | NA                     |
| <b>MeHg NRC-TORT2 Lobster % Recovery (n)</b>     | NA                | 95 (32)                       | NA                            | 96 (2)                          | 95 (2)                           | 81 (4)                 |
| <b>MeHg ERM-580 % Recovery (n)</b>               | NA                | NA                            | NA                            | NA                              | 69 (2)                           | 89 (2)                 |

MeHg (methylmercury), n (sample size), NA (not applicable), RPD (relative percent difference), THg (total mercury)

<sup>1</sup>References: Daxin (rice MeHg and fish THg),<sup>1</sup> Wanshan (rice THg and MeHg),<sup>2</sup> and Arkansas, USA (rice THg and MeHg).<sup>3</sup>

Table S3. Stable mercury isotopes for rice (n=45) and hair (n=21), and fish/rice consumption (n=21). Hair and rice samples from Daxin, China are paired.

|    |              |                       |                         |                        |                 |                  |                      |                                   | n  | $\delta^{199}\text{Hg}$<br>(‰) | 2 $\sigma$<br>(‰) | $\delta^{200}\text{Hg}$<br>(‰) | 2 $\sigma$<br>(‰) | $\delta^{201}\text{Hg}$<br>(‰) | 2 $\sigma$<br>(‰) | $\delta^{202}\text{Hg}$<br>(‰) | 2 $\sigma$<br>(‰) | $\Delta^{199}\text{Hg}$<br>(‰) | 2 $\sigma$<br>(‰) | $\Delta^{200}\text{Hg}$<br>(‰) | 2 $\sigma$<br>(‰) | $\Delta^{201}\text{Hg}$<br>(‰) | 2 $\sigma$<br>(‰) |
|----|--------------|-----------------------|-------------------------|------------------------|-----------------|------------------|----------------------|-----------------------------------|----|--------------------------------|-------------------|--------------------------------|-------------------|--------------------------------|-------------------|--------------------------------|-------------------|--------------------------------|-------------------|--------------------------------|-------------------|--------------------------------|-------------------|
| id | Rice or Hair | Location <sup>1</sup> | % MeHg intake from rice | Fish (servings/weekly) | Rice THg (ng/g) | Rice MeHg (ng/g) | Rice % MeHg (of THg) | Hair THg (T2) ( $\mu\text{g/g}$ ) | n  | $\delta^{199}\text{Hg}$<br>(‰) | 2 $\sigma$<br>(‰) | $\delta^{200}\text{Hg}$<br>(‰) | 2 $\sigma$<br>(‰) | $\delta^{201}\text{Hg}$<br>(‰) | 2 $\sigma$<br>(‰) | $\delta^{202}\text{Hg}$<br>(‰) | 2 $\sigma$<br>(‰) | $\Delta^{199}\text{Hg}$<br>(‰) | 2 $\sigma$<br>(‰) | $\Delta^{200}\text{Hg}$<br>(‰) | 2 $\sigma$<br>(‰) | $\Delta^{201}\text{Hg}$<br>(‰) | 2 $\sigma$<br>(‰) |
|    |              |                       |                         |                        |                 |                  |                      | UM-Almadén                        | 18 | -0.15                          | 0.08              | -0.25                          | 0.08              | -0.40                          | 0.11              | -0.51                          | 0.07              | -0.02                          | 0.07              | 0.00                           | 0.06              | -0.02                          | 0.09              |
|    |              |                       |                         |                        |                 |                  |                      | IAEA-086 (hair)                   | 2  | 0.48                           | 0.01              | 0.41                           | 0.10              | 0.82                           | 0.11              | 0.77                           | 0.10              | 0.29                           | 0.01              | 0.02                           | 0.05              | 0.24                           | 0.03              |
|    |              |                       |                         |                        |                 |                  |                      | TORT-2 (lobster)                  | 3  | 0.80                           | 0.05              | 0.13                           | 0.07              | 0.74                           | 0.13              | 0.18                           | 0.11              | 0.75                           | 0.02              | 0.04                           | 0.04              | 0.60                           | 0.06              |
| 1  | Rice         | Daxin                 | 95.0                    | 0.21                   | 13.9            | 12.5             | 90.1                 |                                   | 1  | -0.30                          |                   | -0.70                          |                   | -1.00                          |                   | -1.32                          |                   | 0.03                           |                   | -0.04                          |                   | -0.01                          |                   |
| 1  | Hair         | Daxin                 |                         |                        |                 |                  |                      | 1.54                              | 1  | -0.04                          |                   | -0.09                          |                   | -0.13                          |                   | -0.11                          |                   | -0.01                          |                   | -0.04                          |                   | -0.05                          |                   |
| 2  | Rice         | Daxin                 | 87.0                    | 0.49                   | 14.2            | 6.55             | 46.3                 |                                   | 1  | -0.18                          |                   | -0.62                          |                   | -0.92                          |                   | -1.33                          |                   | 0.15                           |                   | 0.04                           |                   | 0.07                           |                   |
| 2  | Hair         | Daxin                 |                         |                        |                 |                  |                      | 1.19                              | 1  | 0.05                           |                   | 0.26                           |                   | 0.36                           |                   | 0.58                           |                   | -0.09                          |                   | -0.03                          |                   | -0.07                          |                   |
| 3  | Rice         | Daxin                 | 100                     | 0                      | 12.4            | 5.66             | 45.7                 |                                   | 1  | -0.65                          |                   | -0.99                          |                   | -1.52                          |                   | -1.74                          |                   | -0.21                          |                   | -0.11                          |                   | -0.21                          |                   |
| 3  | Hair         | Daxin                 |                         |                        |                 |                  |                      | 1.25                              | 1  | 0.55                           |                   | 0.42                           |                   | 0.78                           |                   | 0.71                           |                   | 0.37                           |                   | 0.07                           |                   | 0.25                           |                   |
| 4  | Rice         | Daxin                 | 74.0                    | 0.49                   | 18.7            | 5.26             | 28.1                 |                                   | 1  | -0.24                          |                   | -0.71                          |                   | -1.02                          |                   | -1.49                          |                   | 0.13                           |                   | 0.03                           |                   | 0.10                           |                   |
| 4  | Hair         | Daxin                 |                         |                        |                 |                  |                      | 1.03                              | 1  | 0.46                           |                   | 0.61                           |                   | 0.94                           |                   | 1.07                           |                   | 0.19                           |                   | 0.07                           |                   | 0.133                          |                   |
| 5  | Rice         | Daxin                 | 79.0                    | 1.12                   | 12.0            | 5.79             | 48.3                 |                                   | 1  | -0.62                          |                   | -0.87                          |                   | -1.41                          |                   | -1.67                          |                   | -0.20                          |                   | -0.03                          |                   | -0.16                          |                   |
| 5  | Hair         | Daxin                 |                         |                        |                 |                  |                      | 1.71                              | 1  | -0.01                          |                   | -0.13                          |                   | -0.05                          |                   | -0.15                          |                   | 0.02                           |                   | -0.05                          |                   | 0.07                           |                   |
| 6  | Rice         | Daxin                 | 91.0                    | 0.56                   | 14.0            | 12.1             | 86.7                 |                                   | 1  | -0.36                          |                   | -0.67                          |                   | -0.94                          |                   | -1.17                          |                   | -0.07                          |                   | -0.08                          |                   | -0.06                          |                   |
| 6  | Hair         | Daxin                 |                         |                        |                 |                  |                      | 2.00                              | 1  | 0.14                           |                   | 0.26                           |                   | 0.33                           |                   | 0.57                           |                   | 0.00                           |                   | -0.03                          |                   | -0.10                          |                   |
| 7  | Rice         | Daxin                 | 97.0                    | 0.21                   | 20.7            | 14.6             | 70.7                 |                                   | 1  | -0.50                          |                   | -1.00                          |                   | -1.60                          |                   | -2.08                          |                   | 0.02                           |                   | 0.04                           |                   | -0.04                          |                   |
| 7  | Hair         | Daxin                 |                         |                        |                 |                  |                      | 1.76                              | 1  | 0.07                           |                   | -0.03                          |                   | 0.08                           |                   | -0.04                          |                   | 0.08                           |                   | 0.00                           |                   | 0.11                           |                   |
| 8  | Rice         | Daxin                 | 57.0                    | 5.60                   | 14.1            | 11.1             | 78.6                 |                                   | 1  | -0.32                          |                   | -0.75                          |                   | -1.04                          |                   | -1.40                          |                   | 0.03                           |                   | -0.05                          |                   | 0.01                           |                   |
| 8  | Hair         | Daxin                 |                         |                        |                 |                  |                      | 1.38                              | 1  | 0.24                           |                   | -0.14                          |                   | -0.03                          |                   | -0.25                          |                   | 0.30                           |                   | -0.02                          |                   | 0.16                           |                   |
| 9  | Rice         | Daxin                 | 96.0                    | 0.21                   | 13.5            | 13.0             | 96.3                 |                                   | 1  | -0.31                          |                   | -0.69                          |                   | -0.98                          |                   | -1.41                          |                   | 0.05                           |                   | 0.01                           |                   | 0.07                           |                   |
| 9  | Hair         | Daxin                 |                         |                        |                 |                  |                      | 1.42                              | 1  | 0.31                           |                   | 0.35                           |                   | 0.61                           |                   | 0.77                           |                   | 0.12                           |                   | -0.04                          |                   | 0.03                           |                   |
| 10 | Rice         | Daxin                 | 61.0                    | 1.54                   | 10.4            | 9.26             | 88.9                 |                                   | 1  | -0.30                          |                   | -0.66                          |                   | -1.07                          |                   | -1.37                          |                   | 0.05                           |                   | 0.02                           |                   | -0.04                          |                   |
| 10 | Hair         | Daxin                 |                         |                        |                 |                  |                      | 1.06                              | 1  | 0.25                           |                   | 0.27                           |                   | 0.47                           |                   | 0.52                           |                   | 0.12                           |                   | 0.01                           |                   | 0.08                           |                   |
| 11 | Rice         | Daxin                 | 40.0                    | 5.25                   | 13.0            | 6.91             | 53.2                 |                                   | 1  | -0.45                          |                   | -0.96                          |                   | -1.49                          |                   | -2.04                          |                   | 0.06                           |                   | 0.07                           |                   | 0.05                           |                   |
| 11 | Hair         | Daxin                 |                         |                        |                 |                  |                      | 1.17                              | 1  | 0.22                           |                   | -0.05                          |                   | 0.10                           |                   | -0.13                          |                   | 0.25                           |                   | 0.02                           |                   | 0.20                           |                   |
| 12 | Rice         | Daxin                 | 33.0                    | 2.24                   | 13.5            | 9.22             | 68.3                 |                                   | 1  | -0.38                          |                   | -0.68                          |                   | -1.06                          |                   | -1.38                          |                   | -0.03                          |                   | 0.01                           |                   | -0.02                          |                   |
| 12 | Hair         | Daxin                 |                         |                        |                 |                  |                      | 1.17                              | 1  | 0.39                           |                   | 0.30                           |                   | 0.57                           |                   | 0.45                           |                   | 0.28                           |                   | 0.08                           |                   | 0.23                           |                   |
| 13 | Rice         | Daxin                 | 100                     | 0                      | 9.98            | 9.54             | 95.6                 |                                   | 1  | -0.33                          |                   | -0.78                          |                   | -1.07                          |                   | -1.52                          |                   | 0.05                           |                   | -0.02                          |                   | 0.07                           |                   |
| 13 | Hair         | Daxin                 |                         |                        |                 |                  |                      | 2.71                              | 1  | -0.08                          |                   | -0.22                          |                   | -0.15                          |                   | -0.17                          |                   | -0.04                          |                   | -0.13                          |                   | -0.02                          |                   |
| 14 | Rice         | Daxin                 | 31.0                    | 2.52                   | 19.1            | 6.35             | 33.3                 |                                   | 1  | -0.23                          |                   | -0.58                          |                   | -0.88                          |                   | -1.26                          |                   | 0.08                           |                   | 0.06                           |                   | 0.07                           |                   |
| 14 | Hair         | Daxin                 |                         |                        |                 |                  |                      | 1.11                              | 1  | 0.74                           |                   | 0.63                           |                   | 1.2                            |                   | 1.27                           |                   | 0.42                           |                   | 0.00                           |                   | 0.25                           |                   |
| 15 | Rice         | Daxin                 | 100                     | 0                      | 13.0            | 7.14             | 55.0                 |                                   | 1  | -0.62                          |                   | -0.96                          |                   | -1.58                          |                   | -2.00                          |                   | -0.12                          |                   | 0.05                           |                   | -0.08                          |                   |
| 15 | Hair         | Daxin                 |                         |                        |                 |                  |                      | 2.04                              | 1  | 0.41                           |                   | 0.50                           |                   | 0.83                           |                   | 1.00                           |                   | 0.16                           |                   | 0.00                           |                   | 0.08                           |                   |
| 16 | Rice         | Daxin                 | 100                     | 0                      | 13.7            | 6.69             | 48.7                 |                                   | 1  | -0.56                          |                   | -0.66                          |                   | -1.19                          |                   | -1.26                          |                   | -0.24                          |                   | -0.03                          |                   | -0.24                          |                   |

|    |      |          |      |      |      |      |      |      |   |       |      |       |      |       |      |       |      |       |      |       |      |       |      |
|----|------|----------|------|------|------|------|------|------|---|-------|------|-------|------|-------|------|-------|------|-------|------|-------|------|-------|------|
| 16 | Hair | Daxin    |      |      |      |      |      | 3.05 | 1 | 0.09  |      | 0.31  |      | 0.37  |      | 0.58  |      | -0.06 |      | 0.02  |      | -0.06 |      |
| 17 | Rice | Daxin    | 79.0 | 0.21 | 13.5 | 6.44 | 47.6 |      | 1 | -0.74 |      | -1.11 |      | -1.79 |      | -2.26 |      | -0.17 |      | 0.03  |      | -0.09 |      |
| 17 | Hair | Daxin    |      |      |      |      |      | 1.36 | 2 | 0.16  | 0.01 | 0.14  | 0.03 | 0.25  | 0.00 | 0.21  | 0.13 | 0.10  | 0.04 | 0.03  | 0.03 | 0.09  | 0.09 |
| 18 | Rice | Daxin    | 75.0 | 0.56 | 11.5 | 6.21 | 54.0 |      | 1 | -0.66 |      | -1.05 |      | -1.49 |      | -1.79 |      | -0.21 |      | -0.15 |      | -0.14 |      |
| 18 | Hair | Daxin    |      |      |      |      |      | 1.05 | 2 | 0.61  | 0.06 | 0.55  | 0.06 | 1.01  | 0.07 | 0.89  | 0.11 | 0.38  | 0.03 | 0.10  | 0.11 | 0.35  | 0.00 |
| 19 | Rice | Daxin    | 100  | 0    | 9.50 | 7.00 | 73.9 |      | 1 | -0.47 |      | -0.68 |      | -1.11 |      | -1.35 |      | -0.13 |      | 0.00  |      | -0.10 |      |
| 19 | Hair | Daxin    |      |      |      |      |      | 2.27 | 1 | -0.06 |      | -0.05 |      | -0.07 |      | -0.12 |      | -0.03 |      | 0.02  |      | 0.03  |      |
| 20 | Rice | Daxin    | 100  | 0    | 11.4 | 8.84 | 77.6 |      | 1 | -0.29 |      | -0.64 |      | -0.91 |      | -1.31 |      | 0.04  |      | 0.12  |      | 0.07  |      |
| 20 | Hair | Daxin    |      |      |      |      |      | 1.19 | 1 | -0.29 |      | -0.42 |      | -0.76 |      | -0.86 |      | -0.08 |      | 0.02  |      | -0.11 |      |
| 21 | Rice | Daxin    | 85   | 0.21 | 13.2 | 7.14 | 54.0 |      | 1 | -0.64 |      | -0.90 |      | -1.51 |      | -1.96 |      | -0.15 |      | 0.08  |      | -0.04 |      |
| 21 | Hair | Daxin    |      |      |      |      |      | 1.10 | 1 | -0.02 |      | 0.00  |      | -0.11 |      | -0.07 |      | 0.00  |      | 0.04  |      | -0.06 |      |
| 22 | Rice | Wanshan  |      |      | 12.5 | 2.91 | 23.3 |      | 1 | -0.41 |      | -0.90 |      | -1.42 |      | -1.82 |      | 0.05  |      | 0.02  |      | -0.05 |      |
| 23 | Rice | Wanshan  |      |      | 38.4 | 12.3 | 32.0 |      | 1 | -0.47 |      | -1.02 |      | -1.46 |      | -1.88 |      | 0.01  |      | -0.07 |      | -0.04 |      |
| 24 | Rice | Wanshan  |      |      | 10.6 | 4.99 | 47.0 |      | 1 | -0.09 |      | -0.22 |      | -0.38 |      | -0.46 |      | 0.03  |      | 0.01  |      | -0.03 |      |
| 25 | Rice | Wanshan  |      |      | 20.8 | 7.74 | 37.2 |      | 1 | -0.22 |      | -0.72 |      | -0.99 |      | -1.53 |      | 0.16  |      | 0.05  |      | 0.16  |      |
| 26 | Rice | Wanshan  |      |      | 10.0 | 5.84 | 58.2 |      | 1 | -0.07 |      | -0.01 |      | -0.13 |      | -0.07 |      | -0.05 |      | 0.02  |      | -0.08 |      |
| 27 | Rice | Wanshan  |      |      | 23.6 | 6.90 | 29.2 |      | 1 | -0.35 |      | -0.46 |      | -0.71 |      | -0.86 |      | -0.13 |      | -0.03 |      | -0.06 |      |
| 28 | Rice | Wanshan  |      |      | 26.2 | 12.8 | 48.8 |      | 1 | -0.51 |      | -0.94 |      | -1.39 |      | -1.78 |      | -0.06 |      | -0.05 |      | -0.05 |      |
| 29 | Rice | Wanshan  |      |      | 17.8 | 10.6 | 59.7 |      | 1 | -0.41 |      | -0.74 |      | -1.17 |      | -1.45 |      | -0.04 |      | -0.01 |      | -0.08 |      |
| 30 | Rice | Cisitu   |      |      | 8.91 | 2.83 | 31.8 |      | 1 | -0.60 |      | -1.05 |      | -1.43 |      | -1.91 |      | -0.12 |      | -0.09 |      | 0.01  |      |
| 31 | Rice | Cisitu   |      |      | 15.1 | 3.63 | 24.0 |      | 1 | -0.61 |      | -1.11 |      | -1.63 |      | -2.06 |      | -0.10 |      | -0.08 |      | -0.09 |      |
| 32 | Rice | Cisitu   |      |      | 17.0 | 2.56 | 15.0 |      | 1 | -0.60 |      | -1.28 |      | -2.06 |      | -2.66 |      | 0.07  |      | 0.06  |      | -0.06 |      |
| 33 | Rice | Cisitu   |      |      | 13.1 | 1.76 | 13.4 |      | 1 | -0.58 |      | -0.95 |      | -1.52 |      | -1.95 |      | -0.09 |      | 0.02  |      | -0.05 |      |
| 34 | Rice | Cisitu   |      |      | 25.9 | 11.9 | 46.0 |      | 1 | 0.00  |      | -0.20 |      | -0.28 |      | -0.49 |      | 0.12  |      | 0.04  |      | 0.08  |      |
| 35 | Rice | Cisitu   |      |      | 10.4 | 2.02 | 19.3 |      | 1 | -0.58 |      | -0.94 |      | -1.57 |      | -1.98 |      | -0.08 |      | 0.06  |      | -0.08 |      |
| 36 | Rice | PJV      |      |      | 176  | 8.54 | 4.84 |      | 1 | -0.78 |      | -1.60 |      | -2.50 |      | -3.34 |      | 0.06  |      | 0.08  |      | 0.02  |      |
| 37 | Rice | PJV      |      |      | 169  | 11.1 | 6.59 |      | 1 | -0.97 |      | -1.64 |      | -2.49 |      | -3.13 |      | -0.18 |      | -0.07 |      | -0.13 |      |
| 38 | Rice | PJV      |      |      | 106  | 5.74 | 5.40 |      | 1 | -0.78 |      | -1.54 |      | -2.45 |      | -3.25 |      | 0.04  |      | 0.09  |      | 0.00  |      |
| 39 | Rice | PJV      |      |      | 101  | 6.26 | 6.18 |      | 1 | -0.79 |      | -1.61 |      | -2.47 |      | -3.22 |      | 0.02  |      | 0.01  |      | -0.05 |      |
| 40 | Rice | PJV      |      |      | 200  | 16.7 | 8.36 |      | 1 | -0.91 |      | -1.61 |      | -2.52 |      | -3.23 |      | -0.09 |      | 0.01  |      | -0.09 |      |
| 41 | Rice | PJV      |      |      | 103  | 17.8 | 17.3 |      | 1 | -0.56 |      | -1.03 |      | -1.69 |      | -2.20 |      | 0.00  |      | 0.07  |      | -0.03 |      |
| 42 | Rice | Bombana  |      |      | 16.6 | 7.47 | 45.1 |      | 1 | -0.40 |      | -0.41 |      | -0.76 |      | -0.74 |      | -0.21 |      | -0.04 |      | -0.20 |      |
| 43 | Rice | Arkansas |      |      | 19.9 | 18.1 | 90.9 |      | 1 | -0.40 |      | -0.53 |      | -0.90 |      | -0.98 |      | -0.15 |      | -0.04 |      | -0.17 |      |
| 44 | Rice | Arkansas |      |      | 25.4 | 21.8 | 85.7 |      | 1 | -0.36 |      | -0.44 |      | -0.81 |      | -0.90 |      | -0.13 |      | 0.01  |      | -0.13 |      |
| 45 | Rice | Arkansas |      |      | 8.15 | 7.84 | 96.2 |      | 1 | -0.36 |      | -0.45 |      | -0.79 |      | -0.89 |      | -0.13 |      | 0.00  |      | -0.12 |      |

Hg (mercury), methylmercury (MeHg), PJV (Pangkal Jaya Village), T2 (trimester 2), THg (total mercury)

<sup>1</sup>Locations include Daxin, China; Wanshan, China; Cisitu, Indonesia; Pangkal Jaya Village, Indonesia; Bombana, Indonesia; Arkansas, USA

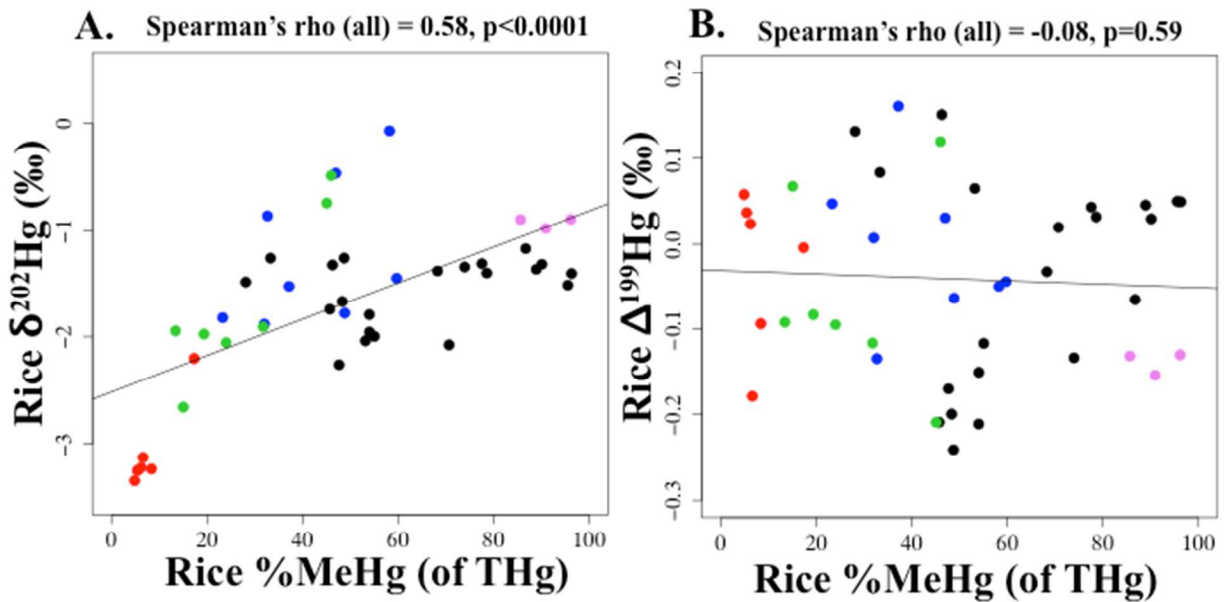

Figure S1. a) Rice  $\delta^{202}\text{Hg}$  versus rice %methylmercury (MeHg) [of total mercury (THg)] ( $n=45$ ). When artisanal and small-scale gold mining sites were excluded (red circles), the association was attenuated (Spearman's rho = 0.37,  $p=0.02$ ,  $n=39$ ). b) Rice  $\Delta^{199}\text{Hg}$  versus rice %MeHg (of THg) ( $n=45$ ). For rice: black (Daxin, China), blue (Wanshan, China), green (background sites in Indonesia), red (artisanal and small scale gold mining sites in Indonesia), and pink (Arkansas, USA).

## REFERENCES

1. Hong, C.; Yu, X.; Liu, J.; Cheng, Y.; Rothenberg, S.E. Low-level methylmercury exposure through rice ingestion in a cohort of pregnant mothers in rural China. *Environ. Res.* **2016**, *150*, 519-527.
2. Rothenberg, S.E.; Yu, X.; Zhang, Y. Prenatal methylmercury exposure through maternal rice ingestion: Insights from a feasibility pilot in Guizhou Province, China. *Environ. Pollut.* **2013**, *180*, 1-8.
3. Rothenberg, S.E.; Anders, M.; Ajami, N.J.; Petrosino, J.F.; Balogh, E. Water management impacts rice methylmercury and the soil microbiome. *Sci. Total Environ.* **2016**, *572*, 608-617.
